# Supplementary material
Source: MDPI journal article supplement (https://www.mdpi.com/2297-8739/9/6/144)
Supplement: s1 [file s1]

## Supplementary data

### **Comparative study of the selective sorption of organic dyes on inorganic materials – a cost-effective way of waste treatment in educational and small research laboratories**

**Anifat Adenike Bankole <sup>1</sup>, Vijo Poullose <sup>1</sup>, Tholkappiyan Ramachandran <sup>2</sup>, Fathalla Hamed <sup>2</sup>, Thies Thiemann<sup>1\*</sup>**

*<sup>1</sup>Department of Chemistry, College of Science, United Arab Emirates University, PO Box 15551, Al Ain, UAE*

*<sup>2</sup>Department of Physics, College of Science, United Arab Emirates University, PO Box 15551, Al Ain, UAE*

Correspondence: [thies@uaeu.ac.ae](mailto:thies@uaeu.ac.ae); [201970017@uaeu.ac.ae](mailto:201970017@uaeu.ac.ae)

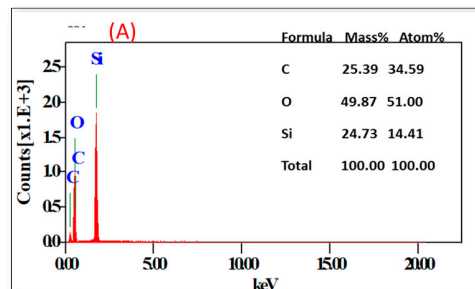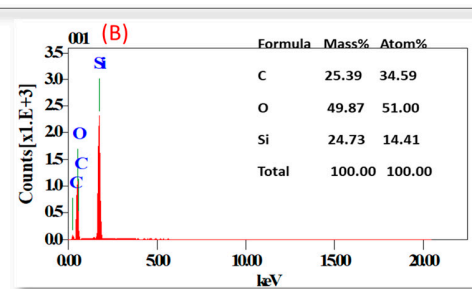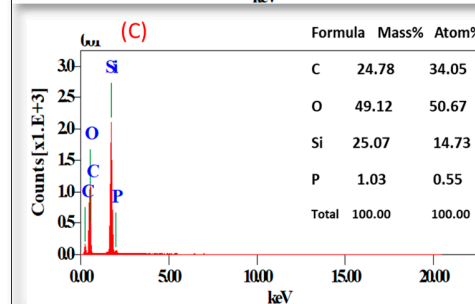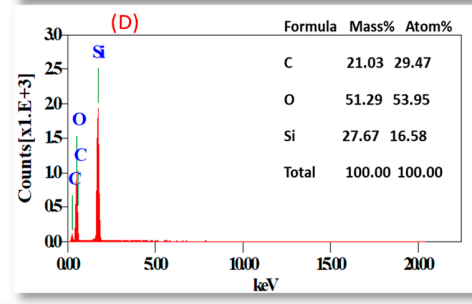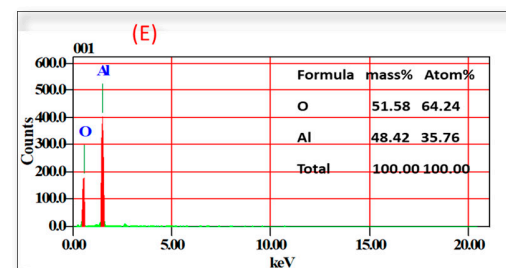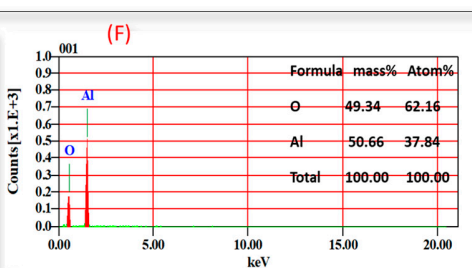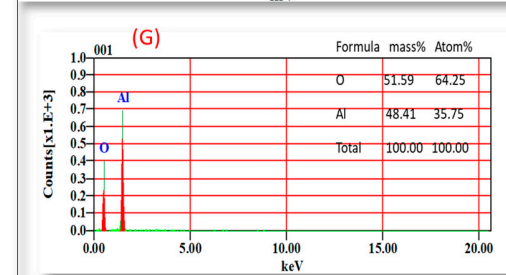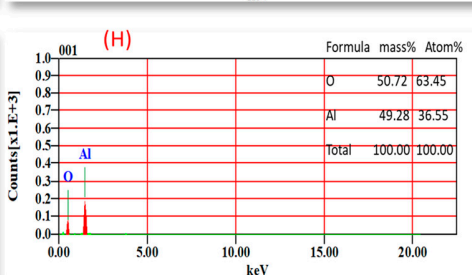

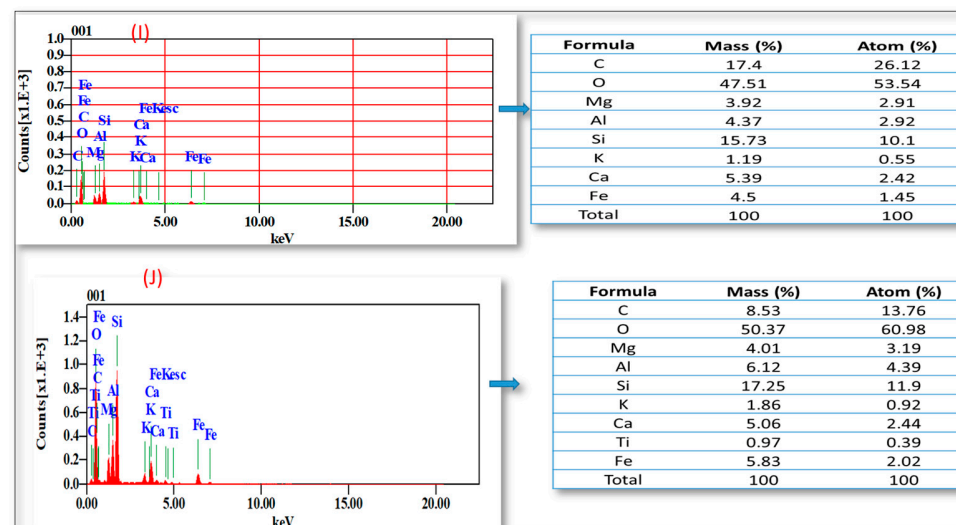

**Figure S1.** EDS elemental analysis of (A) silica 60-120 mesh (B) silica 60-120 mesh (C) used silica before adsorption (D) five-time recycled used silica (E) pure acidic alumina (F) five time recycled acidic alumina (G) pure basic alumina (H) five time recycled basic alumina (I) pure alginite (J) first time recycled alginite.

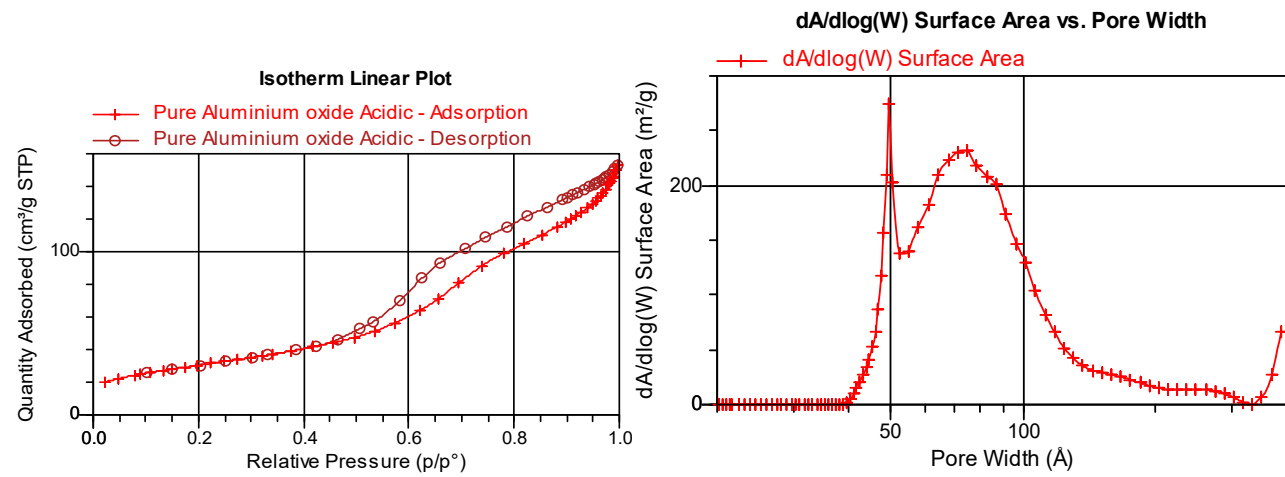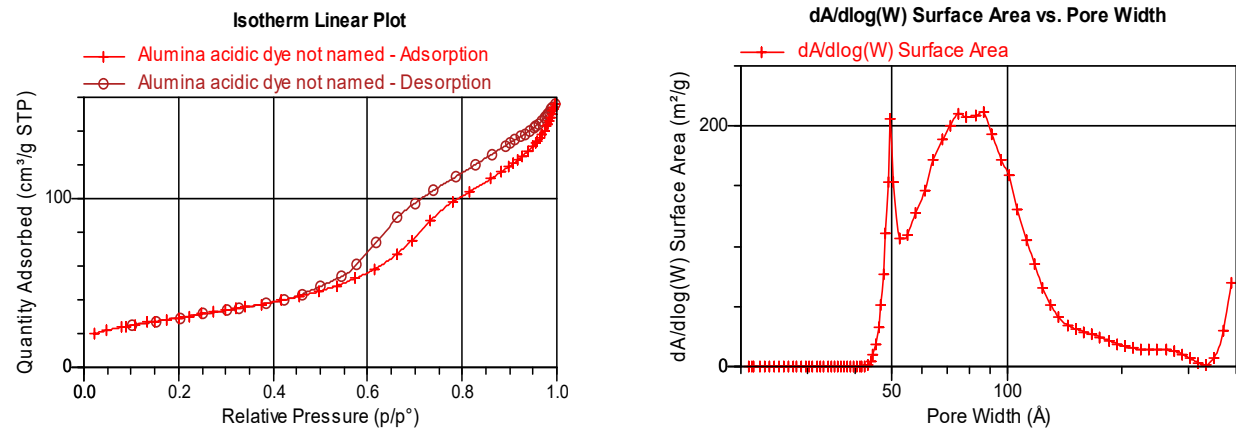

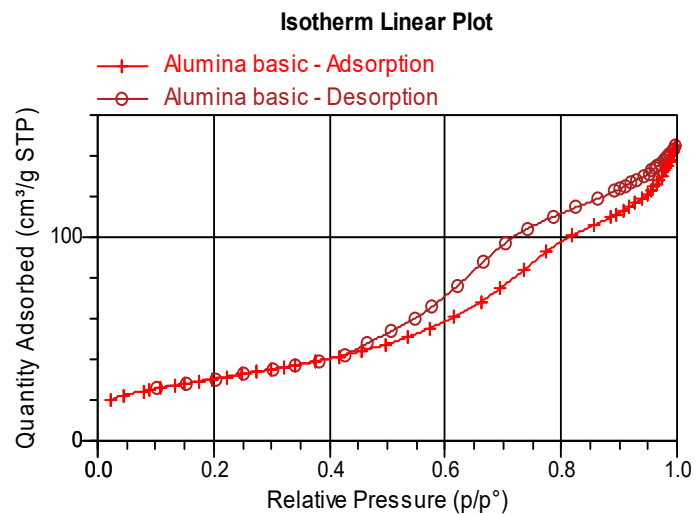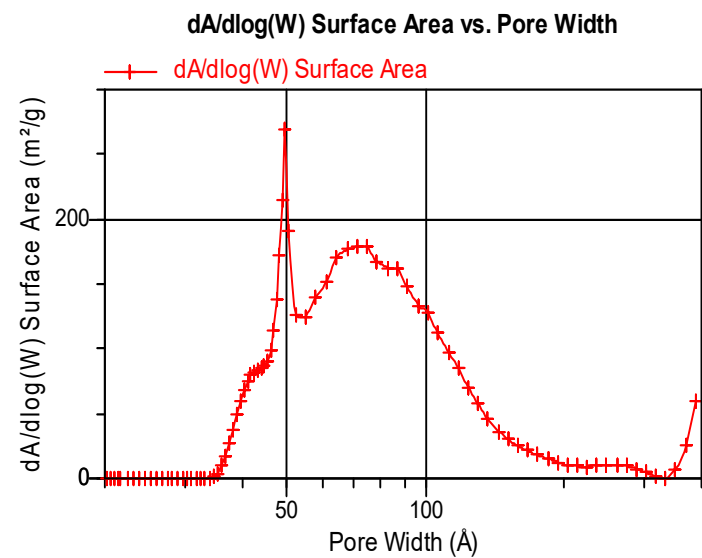

2A

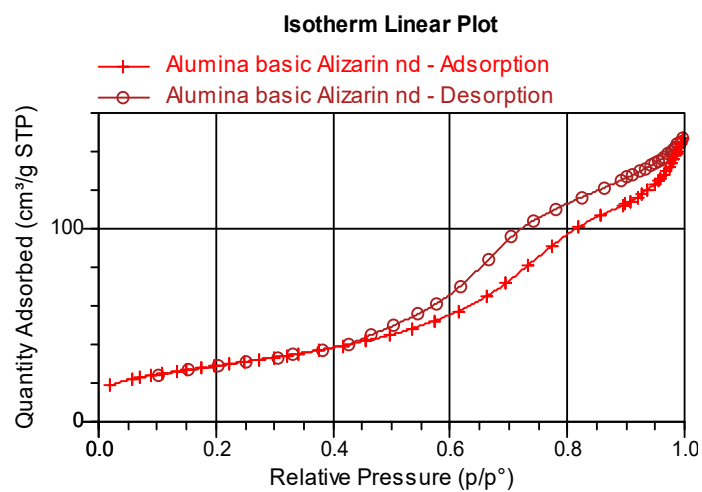

2B

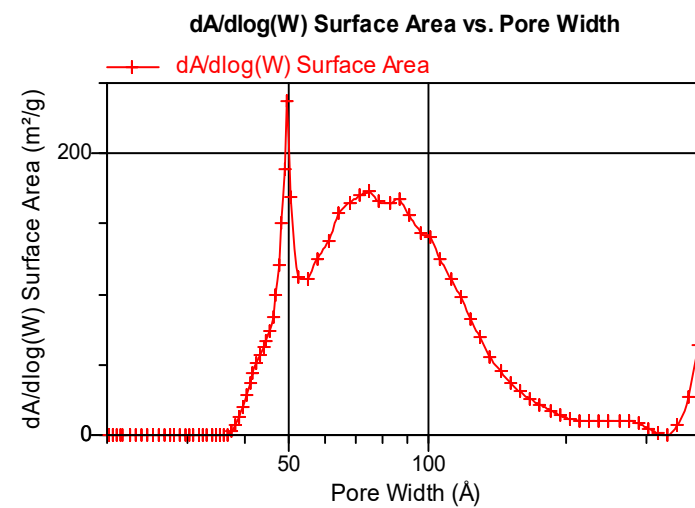

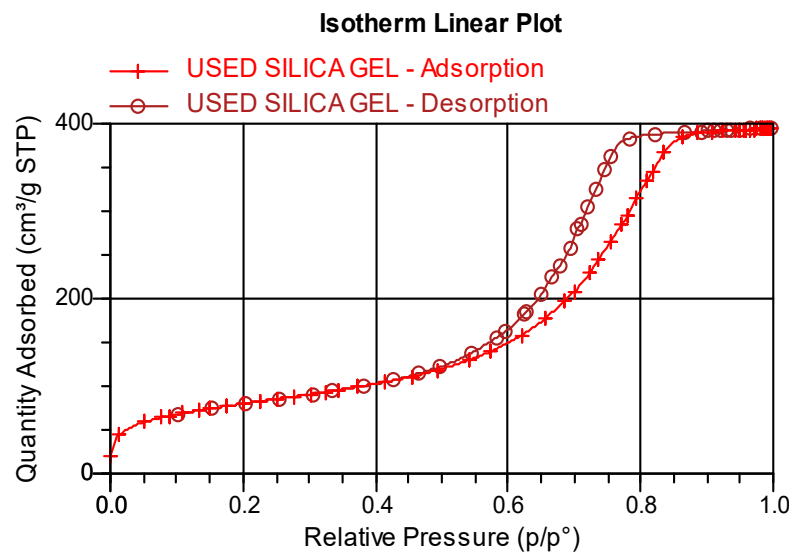

3A

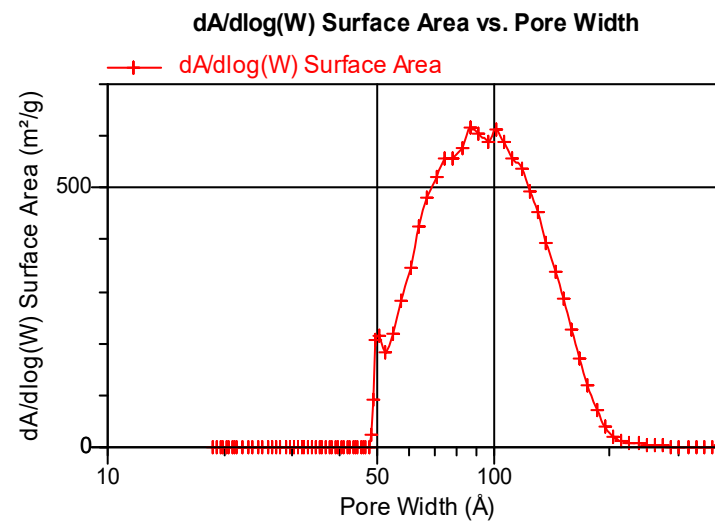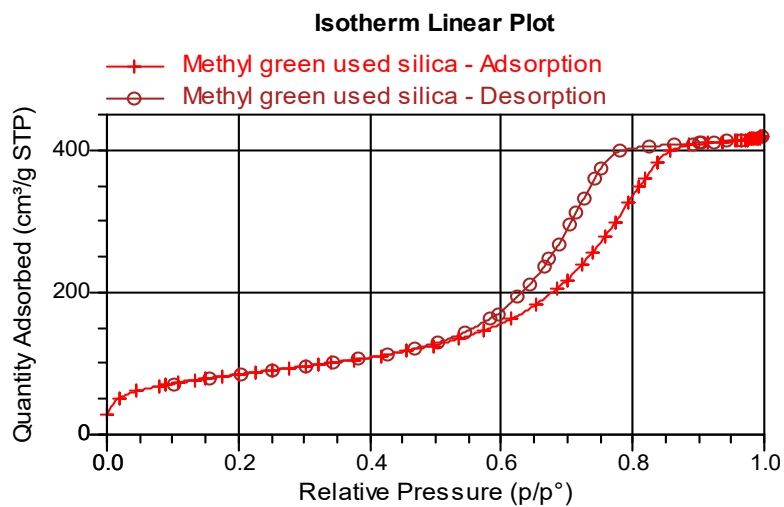

3B

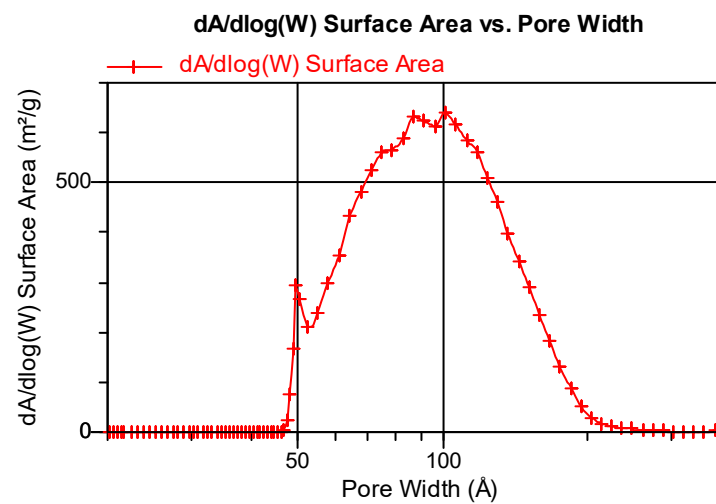

**Figure S2.** The N<sub>2</sub> adsorption-desorption isotherm linear plot and surface area vs pore width plot for pure acidic alumina before adsorption (Fig: 1A) for acidic alumina after five-time regeneration (Fig: 1B), for basic alumina before adsorption (Fig: 2A), for basic alumina after regeneration (Fig: 2B), for used silica gel before adsorption (Fig: 3A), for used silica gel after regeneration (Fig: 3B)
